# Supplementary material for: Bone Bruises of the Ankle and Mid-foot Often Associate with Ankle Sprain
Source: Research Square preprint supplement (doi:10.21203/rs.3.rs-68756/v1), 2020-10-09
Supplement: Supplementary file 1 [file a34152e5817d6b5951e4d0b6.docx]

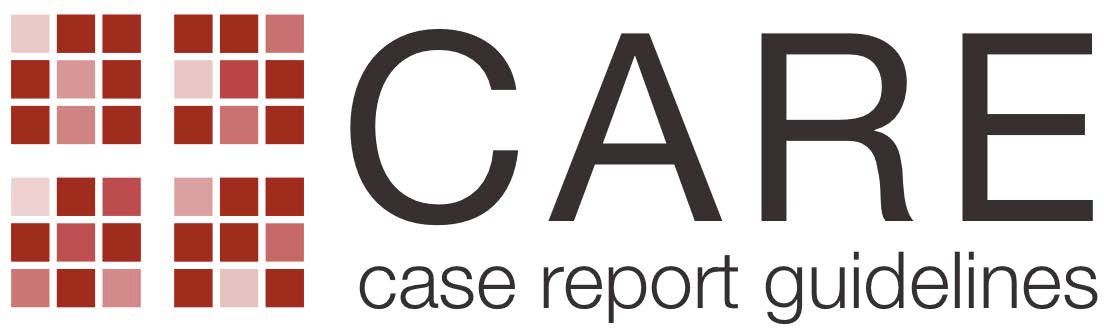
**CARE Checklist of information to include when writing a case report
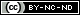
**

**Topic Item Checklist item description Reported on Line**

**Title 1** The diagnosis or intervention of primary focus followed by the words “case report” Page１.Line1

**Key Words 2** 2 to 5 key words that identify diagnoses or interventions in this case report, including "case report" Page2, Line27

# Abstract

**(no references)**

**3a** Introduction: What is unique about this case and what does it add to the scientific literature? Page2, Line2-5

**3b** Main symptoms and/or important clinical findings Page2, Line8-13

**3c** The main diagnoses, therapeutic interventions, and outcomes Page2, Line14-22

**3d** Conclusion—What is the main “take-away” lesson(s) from this case? Page2, Line23-26

**Introduction 4** One or two paragraphs summarizing why this case is unique (**may include references**).............. Page3, Line25-37

**Patient Information 5a** De-identified patient specific information ......Page4, Line9-17

**5b** Primary concerns and symptoms of the patient Page4, Line4-7

**5c** Medical, family, and psycho-social history including relevant genetic information N/A

**5d** Relevant past interventions with outcomes N/A

# Clinical Findings

**Timeline**

**Diagnostic Assessment**

**Therapeutic Intervention**

**Follow-up and Outcomes**

1. Describe significant physical examination (PE) and important clinical findings Page3, Line2-7
2. Historical and current information from this episode of care organized as a timeline......................... . . . . . N/A

**8a** Diagnostic testing (such as PE, laboratory testing, imaging, surveys). Page4, Line18-32

**8b** Diagnostic challenges (such as access to testing, financial, or cultural) 　N/A

**8c** Diagnosis (including other diagnoses considered) Page5. Line9-31

**8d** Prognosis (such as staging in oncology) where applicable N/A

**9a** Types of therapeutic intervention (such as pharmacologic, surgical, preventive, self-care) ............................Page3, Line40-Page4. Line2

**9b** Administration of therapeutic intervention (such as dosage, strength, duration) Page4, Line4-7

**9c** Changes in therapeutic intervention (with rationale) N/A

**10a** Clinician and patient-assessed outcomes (if available) Page4. Line16-17]

**10b** Important follow-up diagnostic and other test results N/A

**10c** Intervention adherence and tolerability (How was this assessed?) ......................................................................... Page4.Line14-17

**10d** Adverse and unanticipated events ................................................................................................................................ 　　 Page4. Line14-15

**Discussion 11a** A scientific discussion of the strengths AND limitations associated with this case report.................................... Page8. Line1-13

**11b** Discussion of the relevant medical literature **with references** ....................................................................　　 Page7, line7-141

**11c** The scientific rationale for any conclusions (including assessment of possible causes)................................... 　　Page6, Line32-36

**11d** The primary “take-away” lessons of this case report (without references) in a one paragraph conclusion......　　 Page7, Line29-36

**Patient Perspective 12** The patient should share their perspective in one to two paragraphs on the treatment(s) they received...... .Page3, Line29-Page4, Line6

**Informed Consent 13** Did the patient give informed consent? Please provide if requested . . . . . . . . . . . . . . . . . . . . . . . . . . . . . . . . . . . . Yes No □
